# Supplementary material for: Melatonin alleviates low-sulfur stress by promoting sulfur homeostasis in tomato plants
Source: PubMed Central journal article supplement (PMC6033901; doi:10.1038/s41598-018-28561-0), 2018-07-05

# **Melatonin alleviates low-sulfur stress by promoting sulfur homeostasis in tomato plants**

**Md. Kamrul Hasan<sup>1,2</sup>, Chen-Xu Liu<sup>1</sup>, Yan-Ting Pan<sup>1</sup>, Golam Jalal Ahammed<sup>3</sup>, Zhen-Yu Qi<sup>1,4\*</sup>, Jie Zhou<sup>1,5\*</sup>**

<sup>1</sup>Department of Horticulture/Zhejiang Provincial Key Laboratory of Horticultural Plant Integrative Biology, Zhejiang University, Yuhangtang Road 866, Hangzhou, 310058, PR China;

<sup>2</sup>Department of Agricultural Chemistry, Sylhet Agricultural University, Sylhet, 3100, Bangladesh;

<sup>3</sup>College of Forestry, Henan University of Science and Technology, Luoyang, 471023, PR China;

<sup>4</sup>Agricultural Experiment Station, Zhejiang University, Yuhangtang Road 866, Hangzhou, 310058, PR China;

<sup>5</sup>Key Laboratory of Horticultural Plants Growth, Development and Quality Improvement, Agricultural Ministry of China, Yuhangtang Road 866, Hangzhou, 310058, PR China

## Supplementary information

**Supplementary Table-S1** Primer sequences used for the qRT-PCR of selected genes.

| Gene name    | Functional annotations                                       | Primer sequences (5'-3')                            | Accession numbers  |
|--------------|--------------------------------------------------------------|-----------------------------------------------------|--------------------|
| <i>ASMT</i>  | Melatonin biosynthesis                                       | F:TTTGTTAGTGTGCCGAAAGC;<br>R: ACCGCTTCGTAGCAATTCTT  | Solyc03g080180.2.1 |
| <i>SUT1</i>  | Sulfate anion transporter<br><i>SUT1;1</i>                   | F:GATATTGCGATAGGGCCAGT;<br>R: GCAAGACGCTGATACTCGTG  | Solyc10g047170.1.1 |
| <i>SUT2</i>  | Sulfate anion transporter<br><i>SUT1;2</i>                   | F:CCTGTTGCTGTTGTATCGCT;<br>R: CAAATGCAGCCTGGAAAGTA  | Solyc12g056920.1.1 |
| <i>ATPS</i>  | ATP sulfurylase (sulfate<br>adenylyltransferase)             | F: TCGTCTTGAAGATGGCTCTG;<br>R: GGTCGAGCCACCAATTAGAT | Solyc03g005260.2.1 |
| <i>APS</i>   | adenylyl-sulfate reductase                                   | F: TGAGAAGTTGGCTGGTTCTG;<br>R: ATGGCCTTTGAAGAGTGCTT | Solyc02g080640.2.1 |
| <i>SiR</i>   | Sulfite reductase - ferredoxin<br>dependent                  | F:AAAGAACCCTGGTGGTGAAG;<br>R:CATGCAGCTGAAAGGTCTGT   | Solyc11g065620.1.1 |
| <i>OASTL</i> | O-acetylserine (thiol)lyase                                  | F: ATGCTGAGGAGAAGGGCTTA;<br>R: CCATGAATGCCAATCCTACA | Solyc08g014340.2.1 |
| <i>CP1</i>   | Alkyl hydroperoxide reductase<br>/Thiol specific antioxidant | F: AAAGTCCGGTGGTCTAGGTG;<br>R: GTGTAAGCCACGAGAAACCA | Solyc10g082030.1.1 |
| <i>CP2</i>   | Alkyl hydroperoxide reductase<br>/Thiol specific antioxidant | F: ACCATGCATTTCTGCAAGAG;<br>R: CCCTCAACCCTTCTCCACTA | Solyc01g007740.2.1 |
| <i>UBI3</i>  | Ubiquitin3                                                   | F: AGTCCACTCTCCATCTCGTG;<br>R: CTCAGCATTAGGGCACTCCT | Solyc01g056940.2.1 |
| <i>Actin</i> | marker gene                                                  | F: TGGTCGGAATGGGACAGAAG;<br>R: CTCAGTCAGGAGAACAGGGT | Solyc03g078400.2.1 |

**Supplementary Figure S1 (a)** full length blot for the ratio of monomer-to-dimer of 2-CP protein

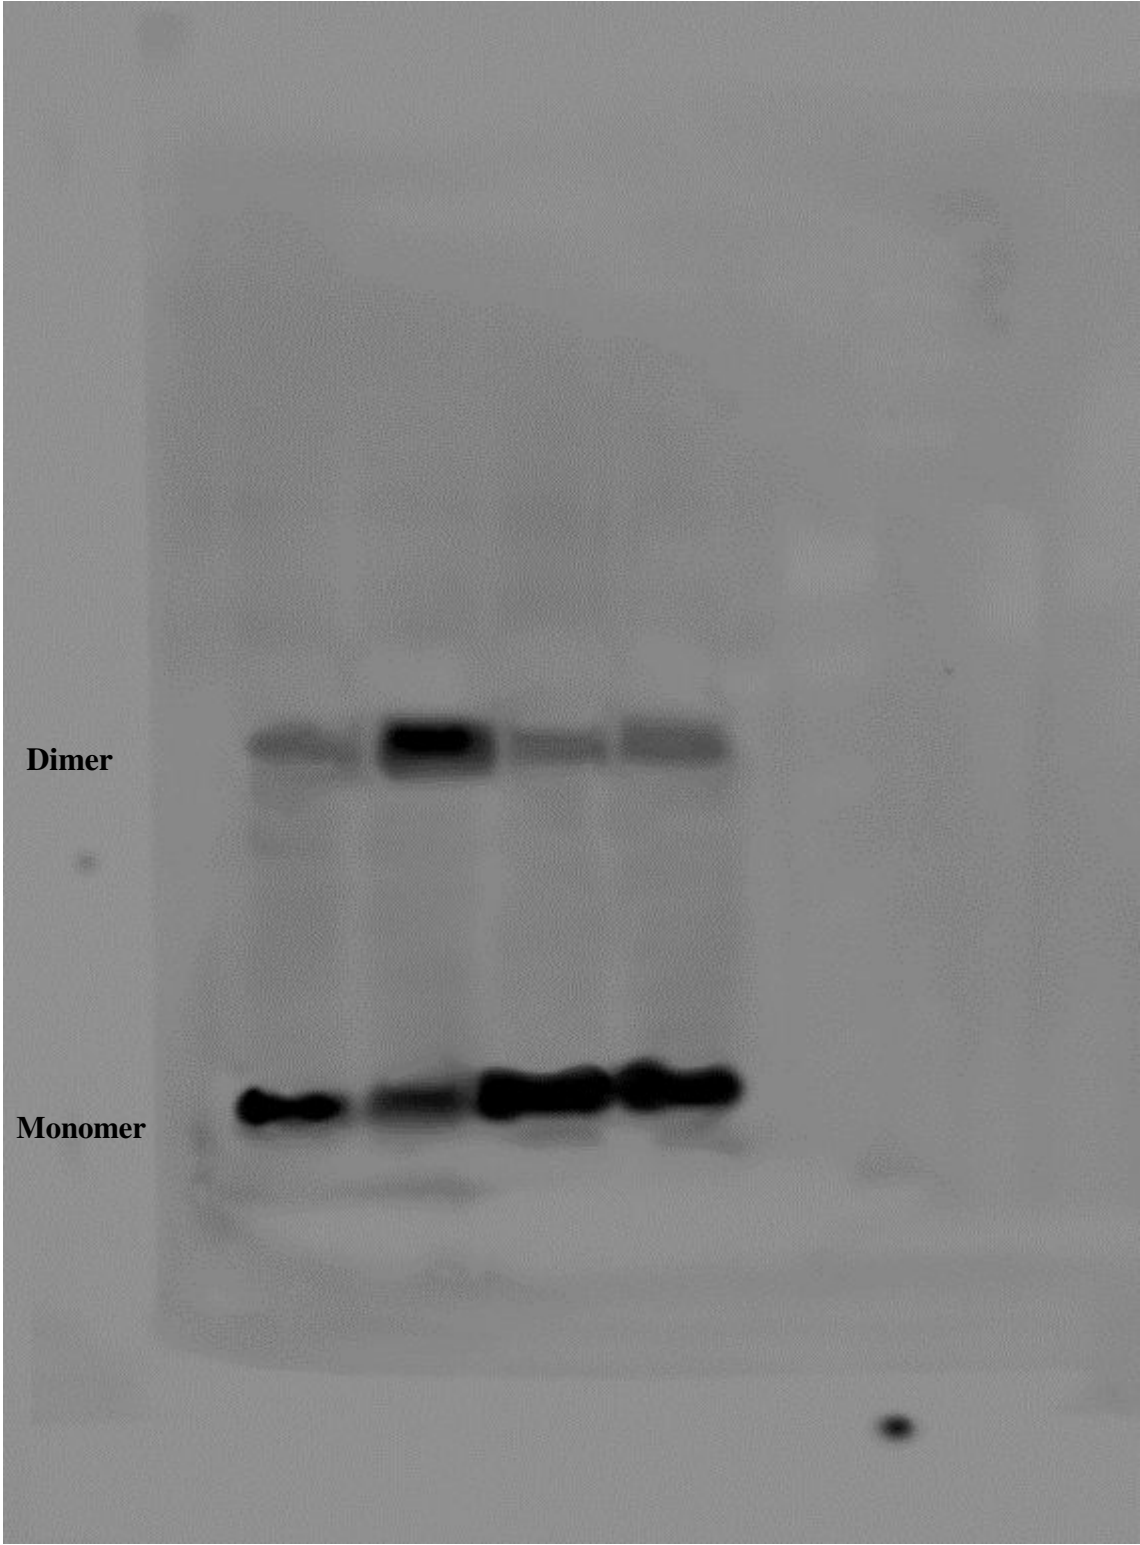

(b) Full length blot of total 2-CP protein

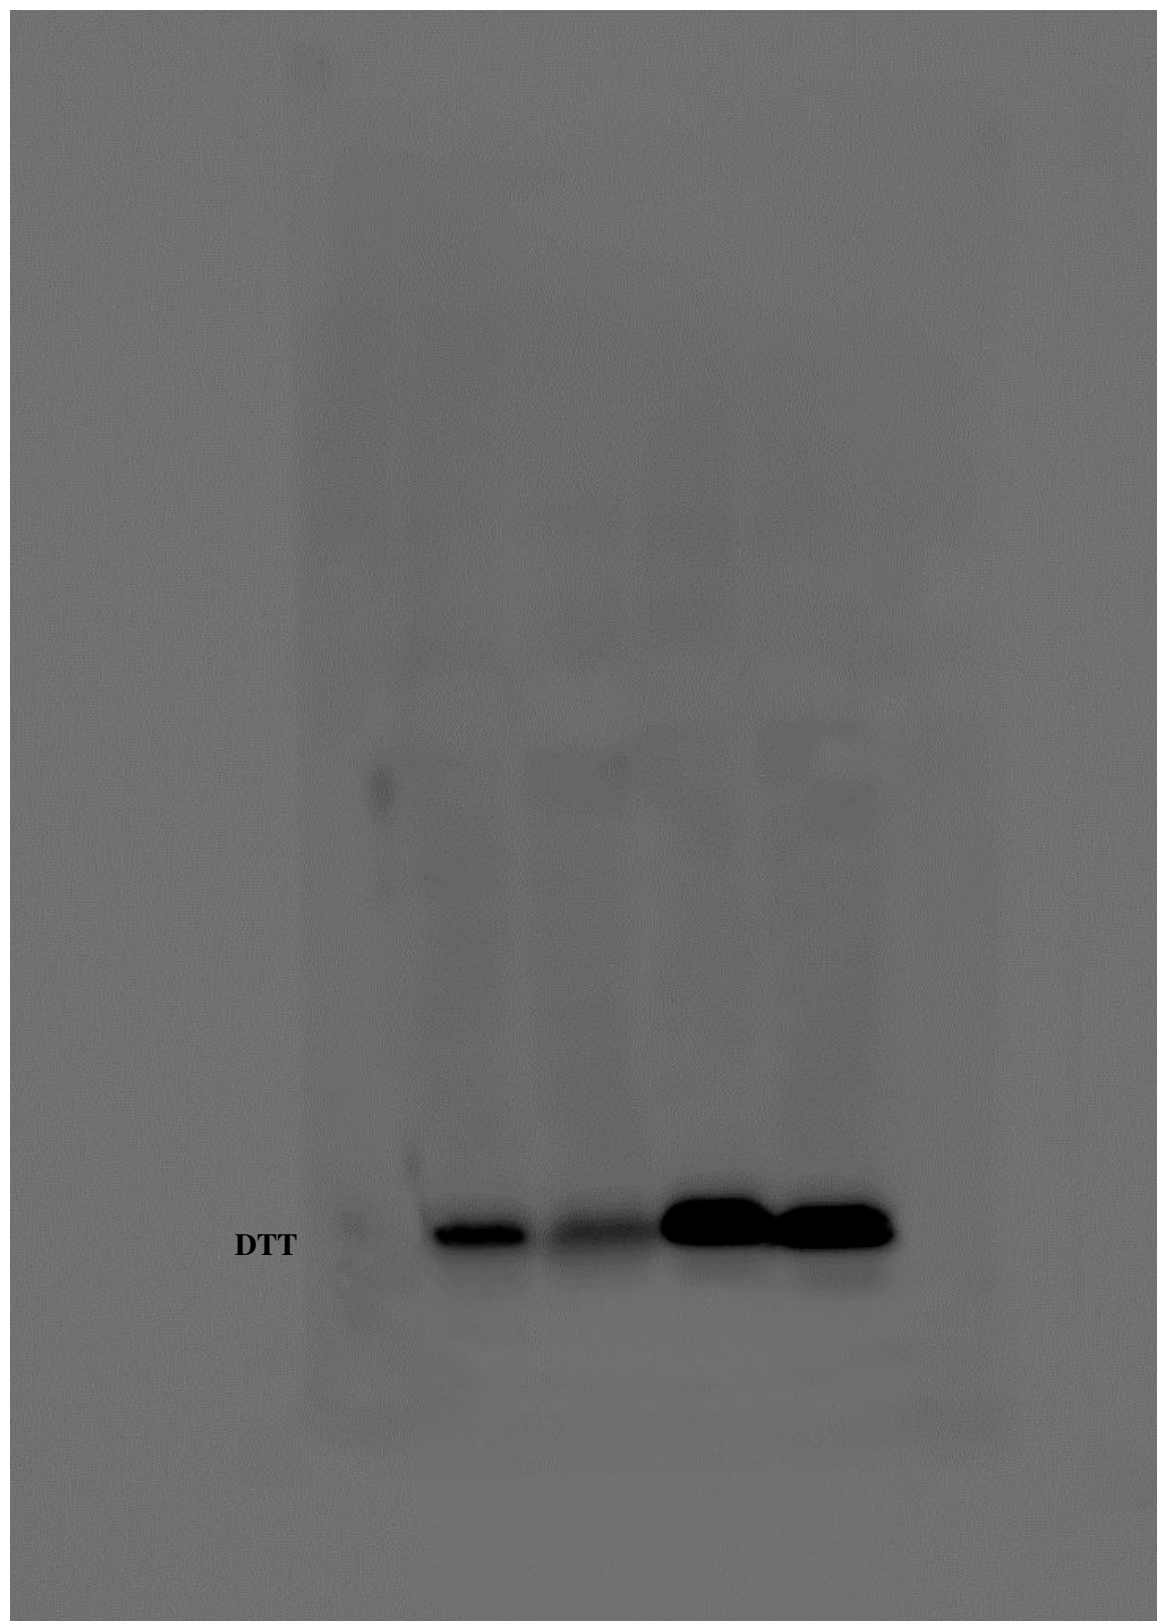

Supplement: 41598_2018_28561_MOESM1_ESM.pdf [file 41598_2018_28561_MOESM1_ESM.pdf]
